# Supplementary material for: Genome-Wide Identification and Genetic Variations of the Starch Synthase Gene Family in Rice
Source: MDPI journal article supplement (doi:10.3390/plants10061154), 2021-06-06

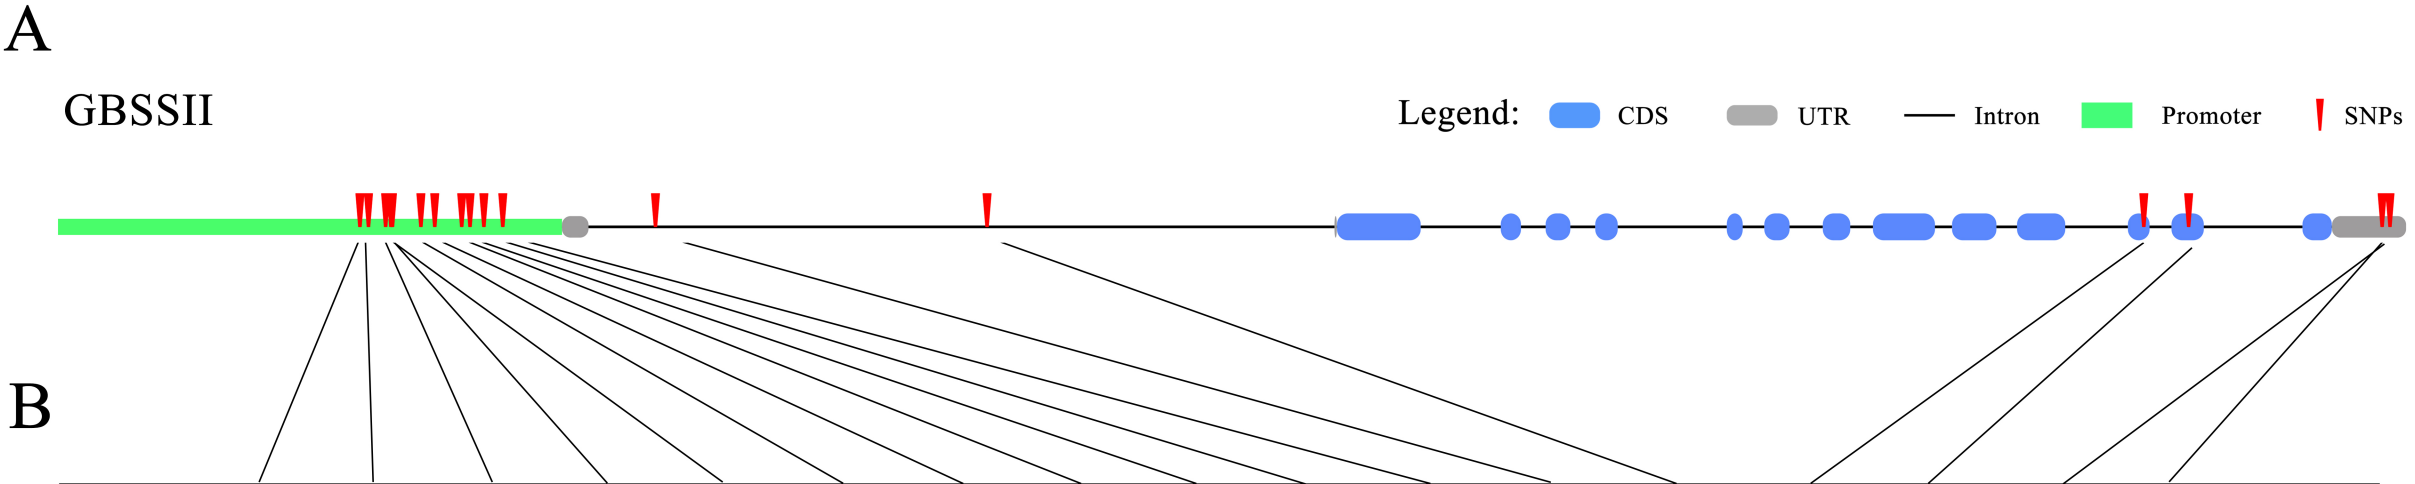

**B**

| ID       | SNP 1    | SNP 2    | SNP 3    | SNP 4    | SNP 5    | SNP 6    | SNP 7    | SNP 8    | SNP 9    | SNP 10   | SNP 11   | SNP 12 | SNP 13 | SNP 14 | SNP 15 | SNP 16 | SNP 17 | Number of accessions |
|----------|----------|----------|----------|----------|----------|----------|----------|----------|----------|----------|----------|--------|--------|--------|--------|--------|--------|----------------------|
| Region   | Promoter | Intron | Intron | Exon   | Exon   | 3'UTR  | 3'UTR  |                      |
| Position | -800     | -766     | -698     | -677     | -671     | -558     | -503     | -396     | -363     | -308     | -233     | 373    | 1689   | 6280   | 6458   | 7226   | 7257   |                      |
| Allele   | T/G      | C/T      | C/G      | G/A      | T/C      | T/C      | G/A      | G/A      | T/A      | C/A      | T/C      | C/T    | C/G    | G/A    | T/C    | G/T    | A/T    |                      |
| Ref.seq  | T        | C        | C        | G        | T        | T        | G        | G        | T        | C        | T        | C      | C      | G      | T      | G      | A      |                      |
| Hap 1    | G        | C        | C        | A        | C        | C        | A        | A        | A        | A        | C        | T      | C      | G      | T      | G      | T      |                      |
| Hap 2    | G        | C        | C        | G        | T        | C        | G        | G        | T        | C        | T        | T      | G      | G      | T      | G      | A      | 3                    |
| Hap 3    | G        | C        | G        | A        | C        | C        | A        | A        | A        | A        | C        | T      | C      | A      | C      | G      | T      | 2                    |
| Hap 4    | T        | C        | C        | G        | T        | T        | G        | G        | T        | C        | T        | T      | G      | G      | T      | T      | A      | 13                   |
| Hap 5    | T        | C        | C        | G        | T        | T        | G        | G        | T        | C        | T        | T      | G      | G      | T      | G      | A      | 39                   |
| Hap 6    | T        | T        | C        | G        | T        | T        | G        | G        | T        | C        | T        | C      | G      | G      | T      | T      | A      | 43                   |
| Hap 6    | T        | T        | C        | G        | T        | T        | G        | G        | T        | C        | T        | C      | G      | G      | T      | T      | A      | 21                   |

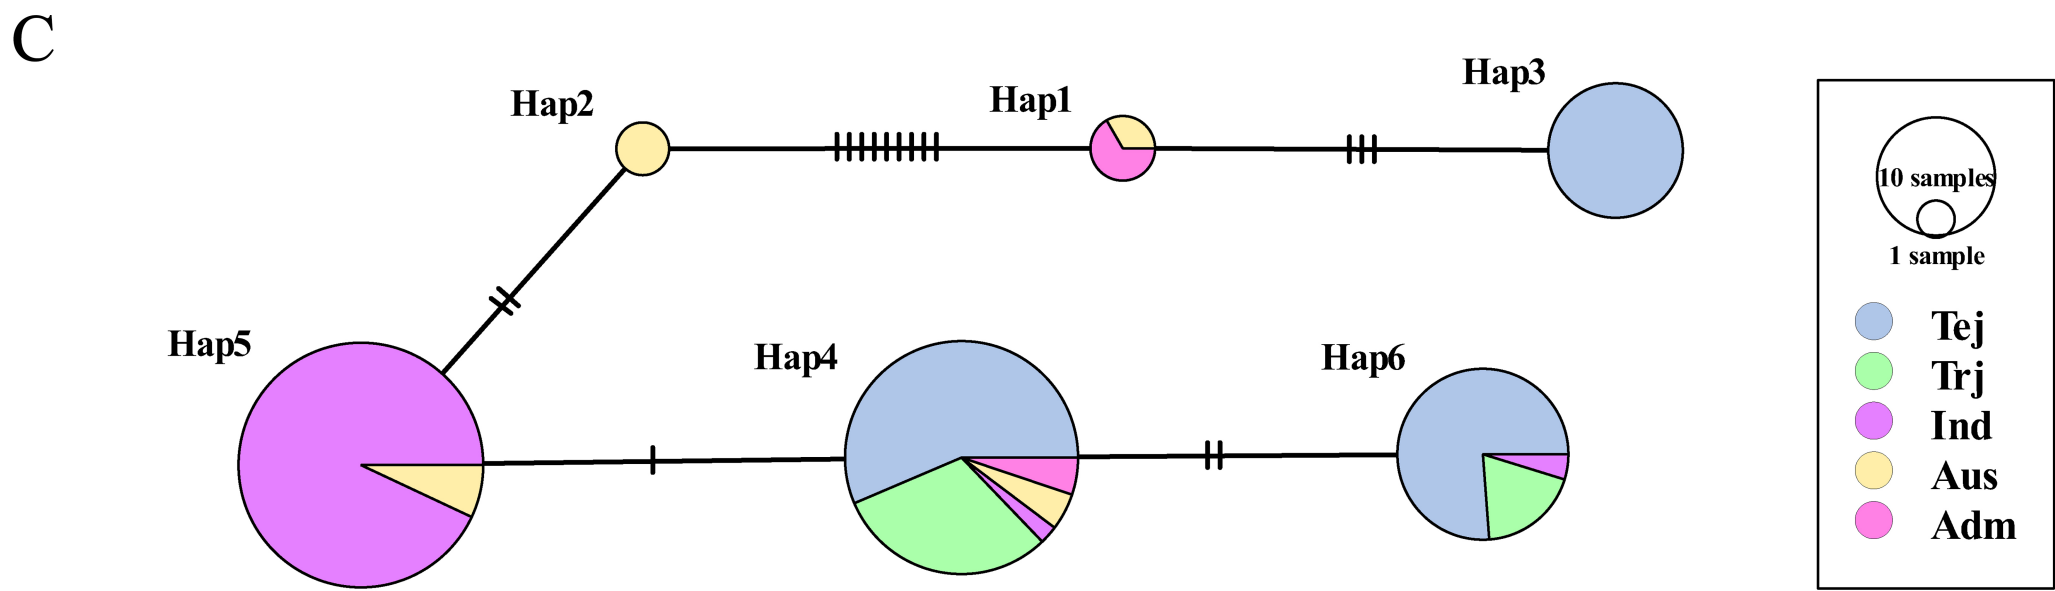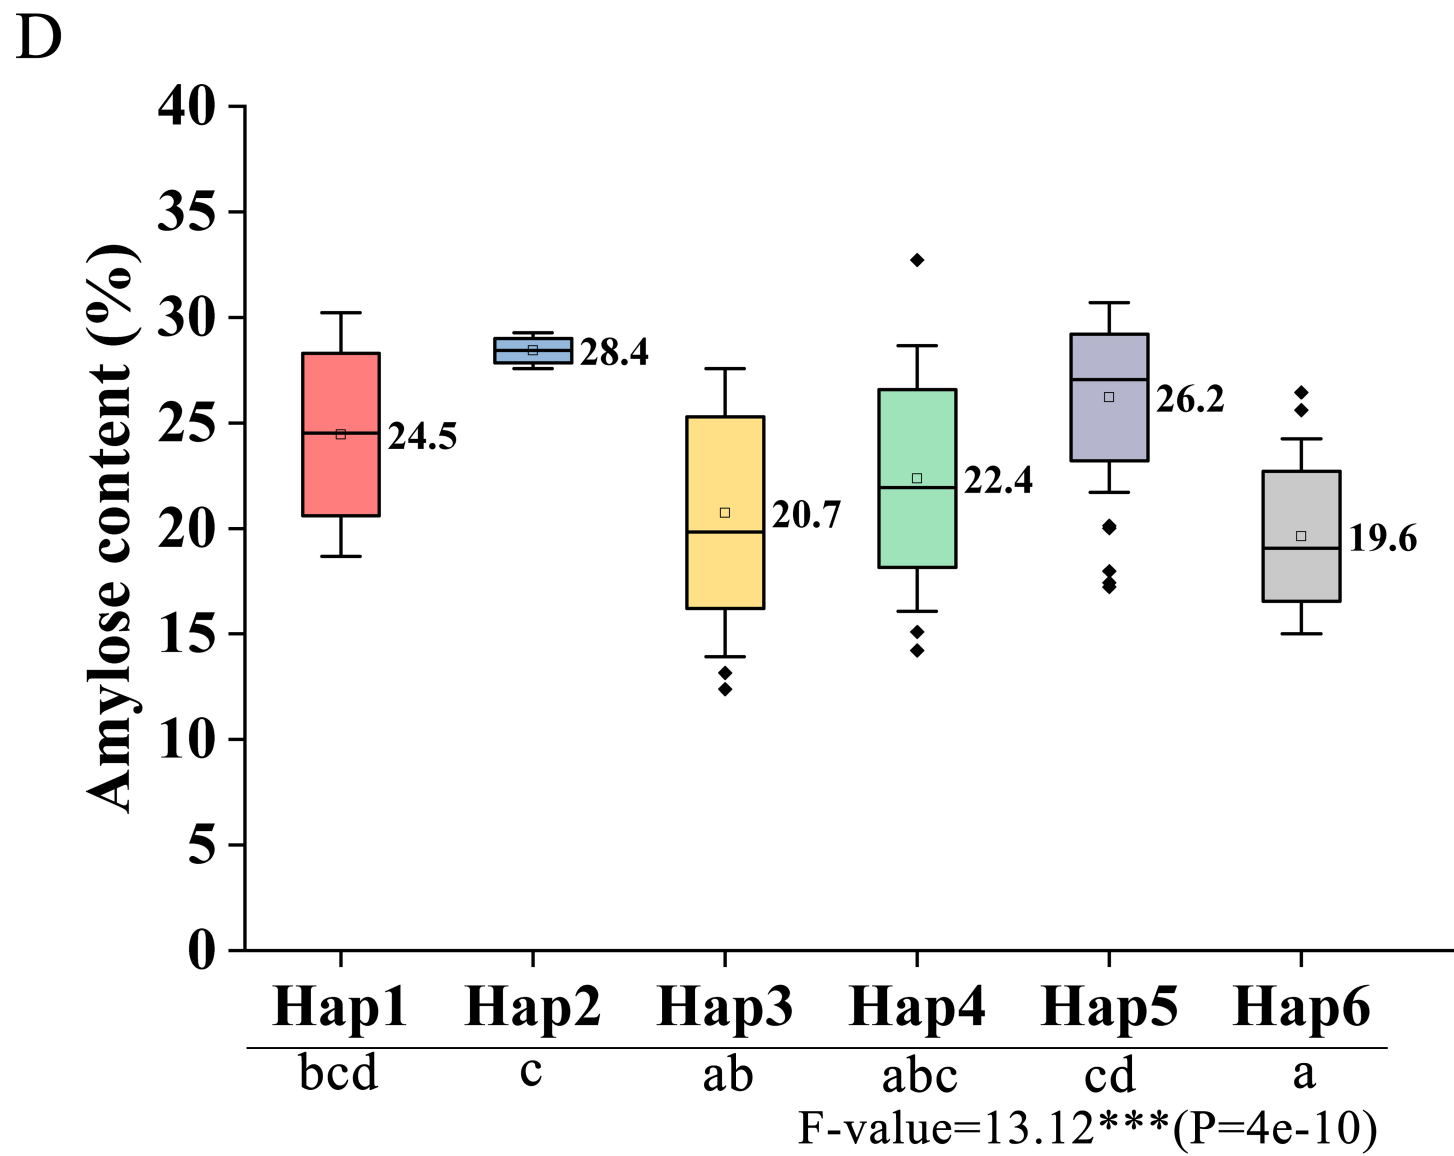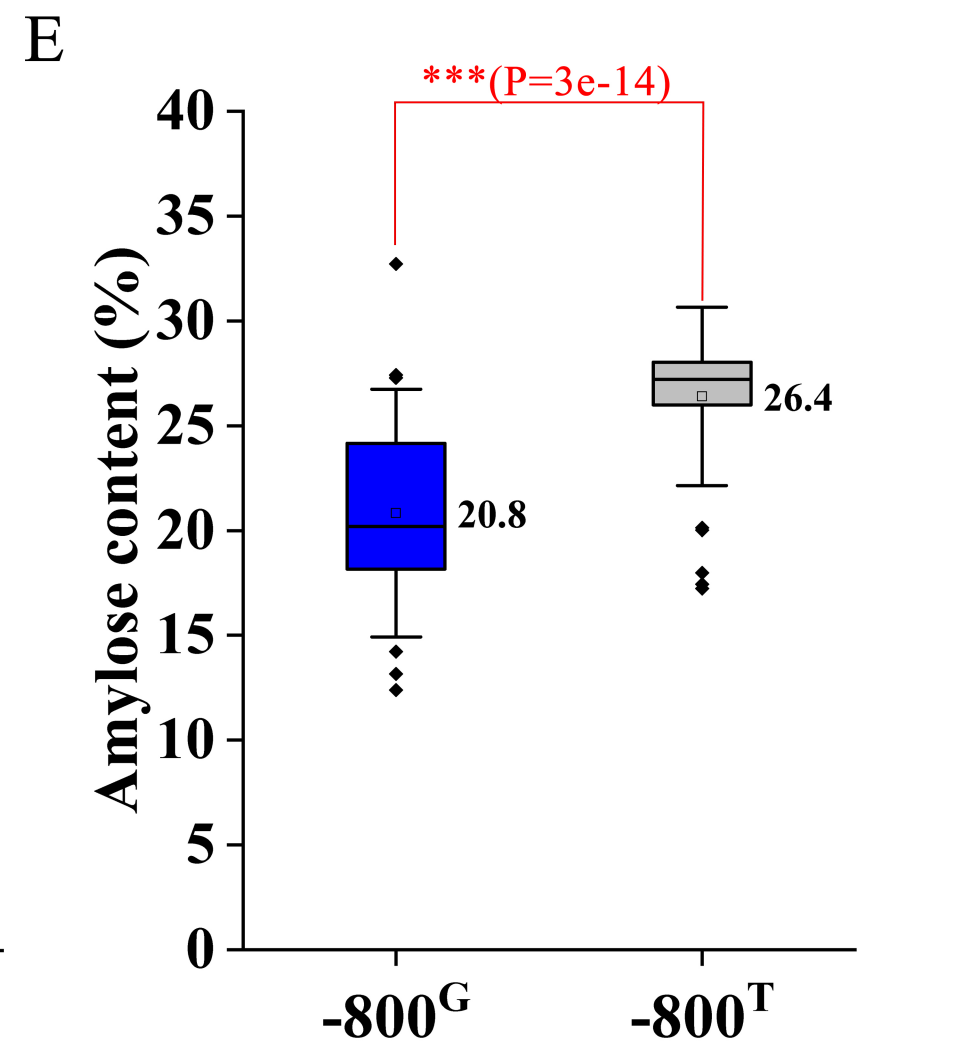

Supplement: s1 [file s1]
