# Supplementary material for: Genome-Wide Identification and Genetic Variations of the Starch Synthase Gene Family in Rice
Source: MDPI journal article supplement (doi:10.3390/plants10061154), 2021-06-06

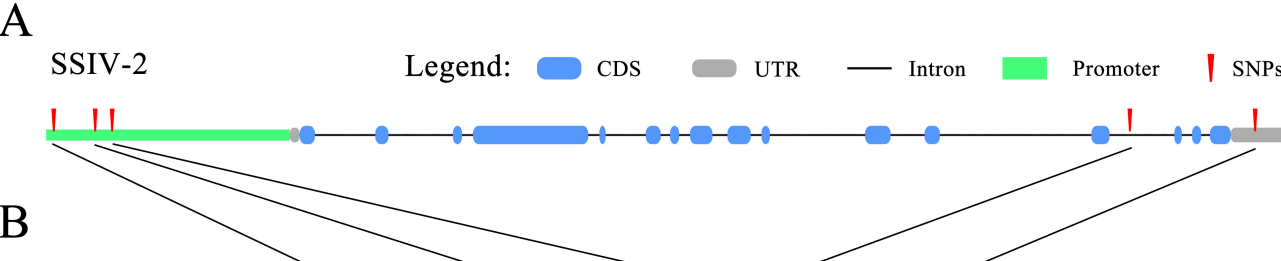

**B**

| ID       | SNP 1    | SNP 2    | SNP 3    | SNP 4  | SNP 5 | Number of accessions |
|----------|----------|----------|----------|--------|-------|----------------------|
| Region   | Promoter | Promoter | Promoter | Intron | 3'UTR |                      |
| Position | -1936    | -1596    | -1457    | 6896   | 7924  |                      |
| Allele   | C/A      | C/T      | G/A      | A/T    | G/A   |                      |
| Ref.seq  | C        | C        | G        | A      | G     |                      |
| Hap 1    | A        | T        | G        | A      | G     | 8                    |
| Hap 2    | C        | C        | A        | A      | G     | 6                    |
| Hap 3    | C        | C        | G        | A      | A     | 39                   |
| Hap 4    | C        | C        | G        | A      | G     | 21                   |
| Hap 5    | C        | T        | G        | A      | G     | 6                    |
| Hap 6    | C        | T        | G        | T      | G     | 41                   |

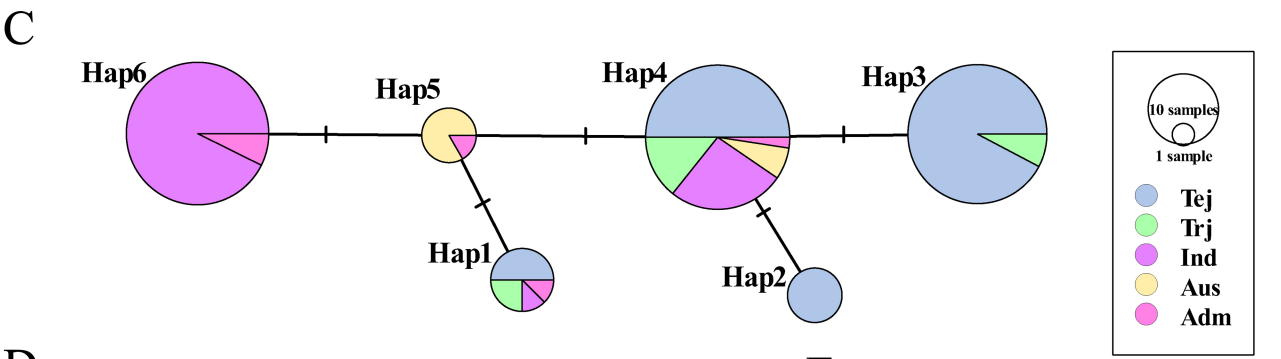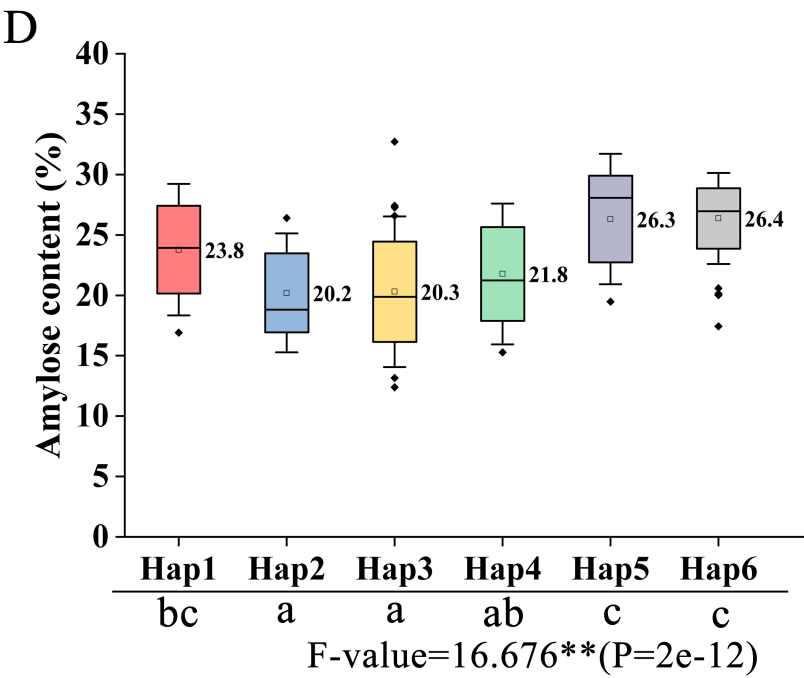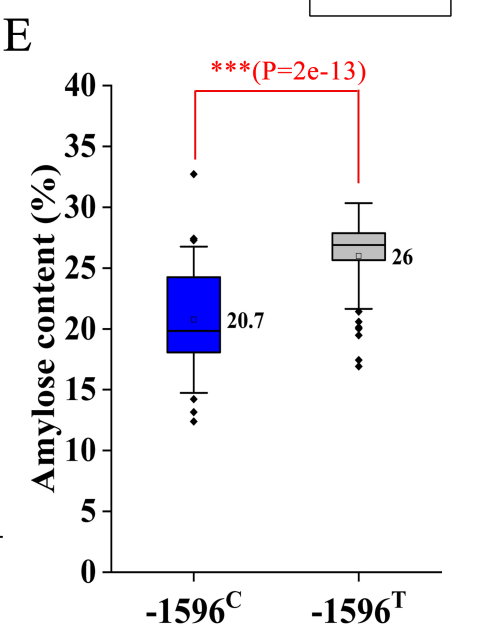

Supplement: s1 [file s1]
