# Supplementary material for: Genome-Wide Identification and Genetic Variations of the Starch Synthase Gene Family in Rice
Source: MDPI journal article supplement (doi:10.3390/plants10061154), 2021-06-06

A

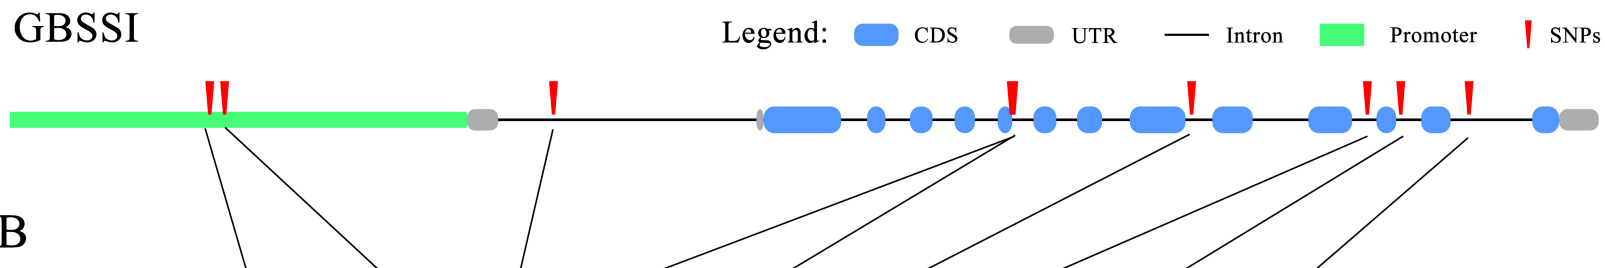

B

| ID       | SNP 1    | SNP 2    | SNP 3  | SNP 4  | SNP 5  | SNP 6  | SNP 7  | SNP 8  | SNP 9  | Number of accessions |
|----------|----------|----------|--------|--------|--------|--------|--------|--------|--------|----------------------|
| Region   | Promoter | Promoter | Intron |                      |
| Position | -1123    | -1058    | 381    | 2384   | 2395   | 3173   | 3942   | 4088   | 4387   |                      |
| Allele   | T/C      | A/G      | C/T    | A/C    | C/T    | A/G    | T/C    | A/G    | T/A    |                      |
| Ref.seq  | T        | A        | C      | A      | C      | A      | T      | A      | T      |                      |
| Hap 1    | C        | G        | C      | A      | C      | G      | C      | G      | T      |                      |
| Hap 2    | T        | A        | C      | A      | C      | A      | T      | A      | T      | 6                    |
| Hap 3    | T        | A        | C      | A      | C      | G      | T      | A      | T      | 55                   |
| Hap 4    | T        | A        | C      | C      | C      | A      | T      | A      | T      | 2                    |
| Hap 5    | C        | G        | T      | A      | T      | A      | T      | A      | A      | 24                   |
| Hap 6    | C        | G        | T      | A      | T      | A      | T      | A      | T      | 26                   |

C

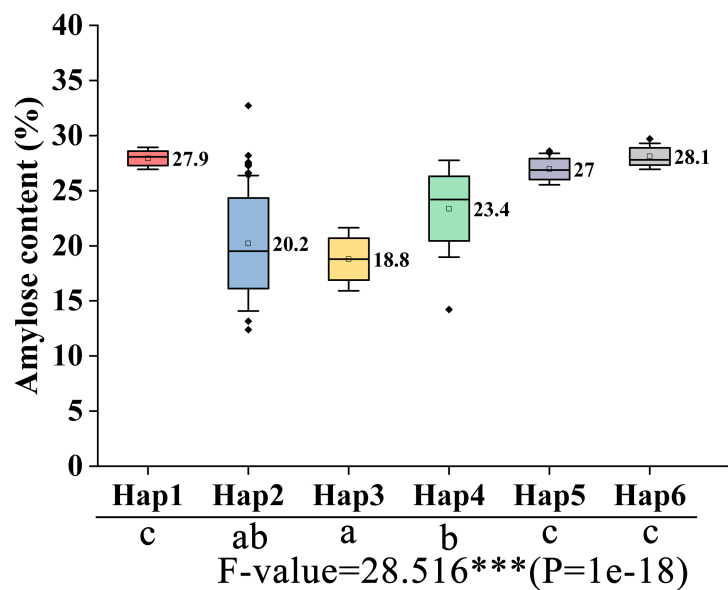

D

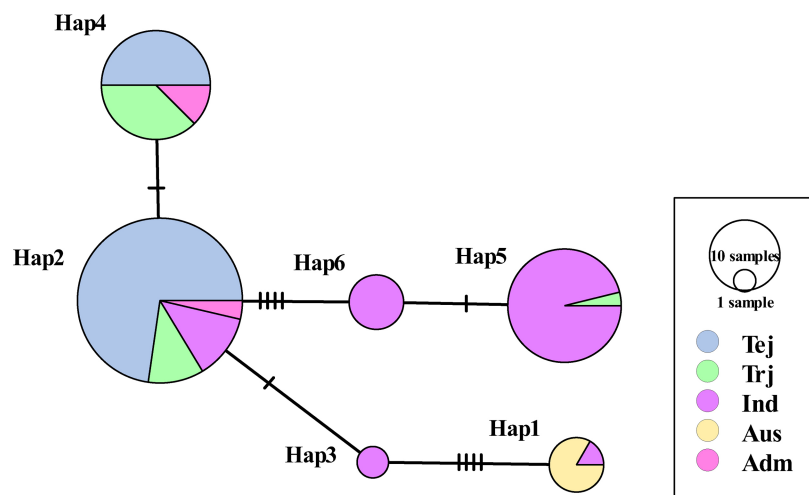

Supplement: s1 [file s1]
