# Supplementary material for: Genome-Wide Identification and Genetic Variations of the Starch Synthase Gene Family in Rice
Source: Plants (Basel). 2021 Jun 6;10(6):1154. doi: 10.3390/plants10061154 (PMC8227427; doi:10.3390/plants10061154)
Supplement: Supplementary file 1 [file plants-10-01154-s001.zip]

Archive with 9 entries (9 files):
- Fig S1.pdf
- Fig S2.pdf
- Fig S3.pdf
- Fig S4.pdf
- Fig S5.pdf
- Fig S6.pdf
- Fig S7.pdf
- Starch-supplement Fig.pdf
- Table S.xlsx
