# Supplementary material for: Genome-Wide Identification and Genetic Variations of the Starch Synthase Gene Family in Rice
Source: Plants (Basel). 2021 Jun 6;10(6):1154. doi: 10.3390/plants10061154 (PMC8227427; doi:10.3390/plants10061154)
Supplement: Supplementary file 1 [file plants-10-01154-s001.zip › Table S.xlsx]

## Sheet: Table S1
Table S1. Motif identification based on PFAM database
Gene ID	Accession	Start	End	Alignment		Model		Domain Alignment			Full Sequence Alignment		Description
				Start	End	Start	End	c-Evalue	i-Evalue	Score	E-value	Score
LOC_Os06g06560	PF08323	134	392	135	391	2	243	3.5e-65	9.4e-62	210.7	6.8e-62	211.2	starch synthase, putative, expressed
LOC_Os10g30156	PF08323	259	502	259	501	1	243	3.4e-67	8.9e-64	217.4	5e-64	218.2	starch synthase, putative, expressed
LOC_Os02g51070	PF08323	204	447	204	446	1	243	3.4e-66	8.9e-63	214.1	3e-63	215.6	starch synthase, putative, expressed
LOC_Os06g12450	PF08323	320	563	320	563	1	244	5.9e-69	1.6e-65	223.1	1.1e-65	223.7	soluble starch synthase 2-3, chloroplast precursor, putative, expressed
LOC_Os04g53310	PF08323	769	962	769	955	1	229	7.9e-47	2.1e-43	150.6	2.3e-45	157.1	soluble starch synthase 3, chloroplast precursor, putative, expressed
LOC_Os08g09230	PF08323	1341	1534	1341	1528	1	230	5.8e-47	1.5e-43	151.1	1.4e-45	157.8	starch synthase III, putative, expressed
LOC_Os01g52250	PF08323	481	720	481	719	1	243	5.1e-65	1.3e-61	210.2	6.2e-62	211.3	starch synthase, putative, expressed
LOC_Os05g45720	PF08323	423	662	423	660	1	242	1.3e-66	3.4e-63	215.4	1.7e-63	216.4	starch synthase, putative, expressed
LOC_Os02g56320	PF08323	243	483	243	482	1	243	1.8e-37	4.9e-34	120	3.1e-34	120.6	glycogen synthase 1, putative, expressed
LOC_Os06g04200	PF08323	84	345	84	344	1	243	8.4e-75	2.2e-71	242.3	1.4e-71	242.9	starch synthase, putative, expressed
LOC_Os07g22930	PF08323	82	343	83	342	2	243	1e-73	2.7e-70	238.7	1.9e-70	239.2	starch synthase, putative, expressed

## Sheet: Table S2
Table S2. Synteny analysis for starch synthase gene family between rice and barley genome
Homologous Genes in Rice Genome					Homologous Genes in Barley Genome				Ka	Ks	Ka/Ks	S	N
Gene Symbol	Gene ID	Chr.	Start	End	Gene ID	Chr.	Start	End
SSII-2	LOC_Os02g51070	Chr2	31232888	31238210	HORVU6Hr1G075950	chr6H	522763226	522767726	0.141264	0.425654	0.331876	160.917	193.083
SSII-2	LOC_Os02g51070	Chr2	31232888	31238210	HORVU7Hr1G038420	chr7H	97659163	97669322	0.254689	0.736314	0.345898	240.25	335.75
SSIII-1	LOC_Os04g53310	Chr4	31750955	31759581	HORVU2Hr1G106410	chr2H	709519135	709526815	0.10625	0.503282	0.211113	295.25	277.75
SSIV-2	LOC_Os05g45720	Chr5	26485807	26494112	HORVU1Hr1G080950	chr1H	526700316	526705339	0.109516	0.575428	0.190321	248.333	213.667
GBSSI	LOC_Os06g04200	Chr6	1765622	1770656	HORVU7Hr1G012380	chr7H	17090632	17094404	0.0991407	0.620783	0.159703	181.833	127.167
SSI	LOC_Os06g06560	Chr6	3079059	3086808	HORVU7Hr1G025390	chr7H	41834939	41841892	0.0652411	0.521085	0.125202	153.5	81.5
SSII-3	LOC_Os06g12450	Chr6	6748358	6753338	HORVU6Hr1G075950	chr6H	522763226	522767726	0.246372	0.723623	0.34047	232.417	317.583
SSII-3	LOC_Os06g12450	Chr6	6748358	6753338	HORVU7Hr1G038420	chr7H	97659163	97669322	0.236174	0.55392	0.426369	230.583	355.417
SSII-1	LOC_Os10g30156	Chr10	15673128	15681124	HORVU1Hr1G035960	chr1H	240532473	240544559	0.18511	0.726499	0.254797	249.25	278.75
								Average	0.160417	0.59851	0.265083	221.37	242.296

## Sheet: Table S3
Table S3. Synteny analysis for starch synthase gene family between rice and maize genome
Homologous Genes in Rice Genome					Homologous Genes in Maize Genome				Ka	Ks	Ka/Ks	S	N
Gene Symbol	Gene ID	Chr.	Start	End	Gene ID	Chr.	Start	End
SSIII-1	LOC_Os04g53310	Chr4	31750955	31759581	Zm00001d026337	chr10	143786832	143795864	0.121357	0.655475	0.185143	348.75	309.25
SSIII-1	LOC_Os04g53310	Chr4	31750955	31759581	Zm00001d002256	chr2	9055230	9066110	0.120312	0.633456	0.18993	341.167	305.833
SSIV-3	LOC_Os02g56320	Chr2	34475930	34483804	Zm00001d051976	chr4	175714876	175730530	0.223248	0.654366	0.341167	156	216
SSII-2	LOC_Os02g51070	Chr2	31232888	31238210	Zm00001d052263	chr4	185228834	185234452	0.140758	0.444374	0.316755	171.167	197.833
SSII-3	LOC_Os06g12450	Chr6	6748358	6753338	Zm00001d052263	chr4	185228834	185234452	0.259336	0.761233	0.340679	252.167	342.833
SSII-1	LOC_Os10g30156	Chr10	15673128	15681124	Zm00001d014150	chr5	34229328	34244969	0.170743	0.6631	0.257491	224.5	251.5
SSII-2	LOC_Os02g51070	Chr2	31232888	31238210	Zm00001d018033	chr5	212494773	212500400	0.142519	0.514878	0.276802	187.833	198.167
SSII-3	LOC_Os06g12450	Chr6	6748358	6753338	Zm00001d018033	chr5	212494773	212500400	0.239377	0.840894	0.284669	260.417	315.583
SSII-2	LOC_Os02g51070	Chr2	31232888	31238210	Zm00001d037234	chr6	117124191	117128209	0.239876	0.782767	0.306446	243.833	315.167
SSII-3	LOC_Os06g12450	Chr6	6748358	6753338	Zm00001d037234	chr6	117124191	117128209	0.186999	0.58422	0.320084	217.833	268.167
GBSSII	LOC_Os07g22930	Chr7	12916277	12924325	Zm00001d019479	chr7	36171251	36178389	0.0844999	0.568614	0.148607	171	111
SSIV-2	LOC_Os05g45720	Chr5	26485807	26494112	Zm00001d010821	chr8	128734662	128743577	0.143298	0.589512	0.243079	250.5	274.5
SSI	LOC_Os06g06560	Chr6	3079059	3086808	Zm00001d045261	chr9	17401885	17412505	0.0641076	0.499179	0.128426	144.5	78.5
GBSSI	LOC_Os06g04200	Chr6	1765622	1770656	Zm00001d045462	chr9	23107329	23111318	0.0978597	0.496123	0.197249	158.333	125.667
								Average	0.159592	0.620585	0.252609	223.429	236.429

## Sheet: Table S4
Table S4. Synteny analysis for starch synthase gene family between rice and sorghum genome
Homologous Genes in Rice Genome					Homologous Genes in Sorghum Genome				Ka	Ks	Ka/Ks	S	N
Gene Symbol	Gene ID	Chr.	Start	End	Gene ID	Chr.	Start	End
GBSSI	LOC_Os06g04200	Chr6	1765622	1770656	SORBI_3010G022600	SbChr10	1860965	1865278	0.0932854	0.474285	0.196686	153.667	120.333
GBSSII	LOC_Os07g22930	Chr7	12916277	12924325	SORBI_3002G116000	SbChr2	14334143	14341029	0.083232	0.575629	0.144593	171.667	109.333
SSII-2	LOC_Os02g51070	Chr2	31232888	31238210	SORBI_3004G238600	SbChr4	58642328	58646857	0.130074	0.442209	0.294145	171	185
SSII-3	LOC_Os06g12450	Chr6	6748358	6753338	SORBI_3004G238600	SbChr4	58642328	58646857	0.244171	0.750653	0.325277	251	328
SSIV-1	LOC_Os01g52250	Chr1	30030997	30041476	SORBI_3009G209300	SbChr9	55613968	55622091	0.198864	0.921542	0.215795	322.5	366.5
SSIV-2	LOC_Os05g45720	Chr5	26485807	26494112	SORBI_3009G209300	SbChr9	55613968	55622091	0.128793	0.59801	0.215369	253	249
SSI	LOC_Os06g06560	Chr6	3079059	3086808	SORBI_3010G047700	SbChr10	3694262	3702940	0.0885941	0.523786	0.169142	174.5	119.5
SSII-2	LOC_Os02g51070	Chr2	31232888	31238210	SORBI_3010G093400	SbChr10	8300126	8304244	0.227558	0.679102	0.335087	229.25	306.75
SSII-3	LOC_Os06g12450	Chr6	6748358	6753338	SORBI_3010G093400	SbChr10	8300126	8304244	0.188255	0.565265	0.333038	227.167	282.833
SSIII-1	LOC_Os04g53310	Chr4	31750955	31759581	SORBI_3007G068200	SbChr7	7589555	7599999	0.208266	1.08228	0.192433	462.667	514.333
SSIII-2	LOC_Os08g09230	Chr8	5352105	5363367	SORBI_3007G068200	SbChr7	7589555	7599999	0.292025	0.806427	0.362122	522.25	901.75
SSIII-1	LOC_Os04g53310	Chr4	31750955	31759581	SORBI_3006G221000	SbChr6	56781695	56790352	0.117059	0.627361	0.18659	338.75	299.25
SSIV-3	LOC_Os02g56320	Chr2	34475930	34483804	SORBI_3004G338100	SbChr4	66997349	67011417	0.175165	0.57804	0.303033	197.667	245.333
SSII-1	LOC_Os10g30156	Chr10	15673128	15681124	SORBI_3001G239500	SbChr1	24604170	24614347	0.171359	0.635347	0.26971	188.083	220.917
								Average	0.167621	0.661424	0.253073	261.655	303.488

## Sheet: Table S5
Table S5. Synteny analysis for starch synthase gene family between rice and soybean genome
Homologous Genes in Rice Genome					Homologous Genes in Soybean Genome				Ka	Ks	Ka/Ks	S	N
Gene Symbol	Gene ID	Chr.	Start	End	Gene ID	Chr.	Start	End
SSII-3	LOC_Os06g12450	Chr6	6748358	6753338	GLYMA_18G260100	chr18	54622265	54623793	0.133602	1.59269	0.0838842	182.185	606.815
SSIII-2	LOC_Os08g09230	Chr8	5352105	5363367	GLYMA_15G108000	chr15	8490006	8500190	0.369034	1.99468	0.185009	531.333	782.667
								Average	0.251318	1.79369	0.134446	356.759	694.741

## Sheet: Table S6
Table S6. Synteny analysis for starch synthase gene family between rice and wheat genome
Homologous Genes in Rice Genome					Homologous Genes in Wheat Genome				Ka	Ks	Ka/Ks	S	N
Gene Symbol	Gene ID	Chr.	Start	End	Gene ID	Chr.	Start	End
SSII-1	LOC_Os10g30156	Chr10	15673128	15681124	TraesCS1A02G137200	chr1A	221695704	221708351	0.15211	0.71718	0.212094	239.417	225.583
SSIV-1	LOC_Os01g52250	Chr1	30030997	30041476	TraesCS1A02G353300	chr1A	536958431	536965909	0.157062	0.894793	0.175529	241.583	224.417
SSIV-2	LOC_Os05g45720	Chr5	26485807	26494112	TraesCS1A02G353300	chr1A	536958431	536965909	0.0797917	0.596504	0.133766	192	120
SSII-1	LOC_Os10g30156	Chr10	15673128	15681124	TraesCS1B02G155700	chr1B	263547930	263561834	0.153535	0.685099	0.224106	231.5	227.5
SSIV-1	LOC_Os01g52250	Chr1	30030997	30041476	TraesCS1B02G368500	chr1B	598877339	598884411	0.214048	0.951139	0.225044	331.167	392.833
SSIV-2	LOC_Os05g45720	Chr5	26485807	26494112	TraesCS1B02G368500	chr1B	598877339	598884411	0.105909	0.581837	0.182026	250.333	207.667
SSII-1	LOC_Os10g30156	Chr10	15673128	15681124	TraesCS1D02G138100	chr1D	189645937	189662052	0.152483	0.679247	0.224489	230.583	226.417
SSIV-1	LOC_Os01g52250	Chr1	30030997	30041476	TraesCS1D02G356900	chr1D	441067006	441074814	0.20489	0.904439	0.226538	322.75	378.25
SSIV-2	LOC_Os05g45720	Chr5	26485807	26494112	TraesCS1D02G356900	chr1D	441067006	441074814	0.105567	0.573107	0.184201	248	207
SSIII-1	LOC_Os04g53310	Chr4	31750955	31759581	TraesCS2A02G468800	chr2A	712573140	712581384	0.10747	0.506978	0.211982	295.417	279.583
SSIII-1	LOC_Os04g53310	Chr4	31750955	31759581	TraesCS2B02G491700	chr2B	690026216	690034656	0.10088	0.483289	0.208736	286.167	264.833
SSIII-1	LOC_Os04g53310	Chr4	31750955	31759581	TraesCS2D02G468900	chr2D	574104017	574113211	0.110854	0.506069	0.219049	296.917	289.083
GBSSI	LOC_Os06g04200	Chr6	1765622	1770656	TraesCS4A02G418200	chr4A	688097145	688100962	0.102337	0.562899	0.181803	171.167	130.833
SSII-2	LOC_Os02g51070	Chr2	31232888	31238210	TraesCS6A02G307800	chr6A	542254563	542259406	0.14071	0.374546	0.375682	146.75	193.25
SSII-3	LOC_Os06g12450	Chr6	6748358	6753338	TraesCS6A02G307800	chr6A	542254563	542259406	0.247749	0.682522	0.36299	224.917	320.083
SSII-2	LOC_Os02g51070	Chr2	31232888	31238210	TraesCS6B02G336400	chr6B	591576409	591581351	0.14032	0.407851	0.344048	156.25	191.75
SSII-2	LOC_Os02g51070	Chr2	31232888	31238210	TraesCS6D02G287000	chr6D	395694103	395700608	0.137665	0.445525	0.308995	165.417	185.583
SSII-3	LOC_Os06g12450	Chr6	6748358	6753338	TraesCS6D02G287000	chr6D	395694103	395700608	0.226371	0.668688	0.33853	218.667	290.333
GBSSI	LOC_Os06g04200	Chr6	1765622	1770656	TraesCS7A02G070100	chr7A	35765406	35769104	0.113767	0.594741	0.191288	177.667	144.333
SSI	LOC_Os06g06560	Chr6	3079059	3086808	TraesCS7A02G120300	chr7A	77434519	77442262	0.080547	0.502994	0.160135	166.5	108.5
SSII-2	LOC_Os02g51070	Chr2	31232888	31238210	TraesCS7A02G189000	chr7A	145465456	145472269	0.240226	0.786368	0.305488	248	319
SSII-3	LOC_Os06g12450	Chr6	6748358	6753338	TraesCS7A02G189000	chr7A	145465456	145472269	0.186004	0.505635	0.367862	211.833	285.167
SSI	LOC_Os06g06560	Chr6	3079059	3086808	TraesCS7B02G018600	chr7B	15592400	15602503	0.0530464	0.513228	0.103358	136	61
SSII-2	LOC_Os02g51070	Chr2	31232888	31238210	TraesCS7B02G093800	chr7B	107604257	107611452	0.22843	0.744211	0.306942	239.083	304.917
SSII-3	LOC_Os06g12450	Chr6	6748358	6753338	TraesCS7B02G093800	chr7B	107604257	107611452	0.195808	0.533441	0.367067	220.417	298.583
GBSSI	LOC_Os06g04200	Chr6	1765622	1770656	TraesCS7D02G064300	chr7D	35595505	35599537	0.110555	0.582735	0.189716	175.5	140.5
SSI	LOC_Os06g06560	Chr6	3079059	3086808	TraesCS7D02G117800	chr7D	72936703	72947152	0.0840798	0.488278	0.172197	164.333	113.667
SSII-3	LOC_Os06g12450	Chr6	6748358	6753338	TraesCS7D02G190100	chr7D	144130174	144137521	0.208465	0.535076	0.389599	221.167	316.833
								Average	0.147881	0.607444	0.246188	221.768	230.268

## Sheet: Table S7
Table S7. Prediction of miRNAs targeted OsSSs identified by psRNATarget online tool.
miRNA_Acc.	Target_Acc.	Expectation	UPE$	miRNA_start	miRNA_end	Target_start	Target_end	miRNA_aligned_fragment	Target_aligned_fragment	Inhibition	Multiplicity
osa-miR172a	SSIV-3	1.5	-1	1	21	509	529	AGAAUCUUGAUGAUGCUGCAU	UAGCAGAAUCAUCAAGGUUCU	Cleavage	1
osa-miR172d	SSIV-3	1.5	-1	1	21	509	529	AGAAUCUUGAUGAUGCUGCAU	UAGCAGAAUCAUCAAGGUUCU	Cleavage	1
osa-miR172b	SSIV-3	2	-1	1	21	509	529	GGAAUCUUGAUGAUGCUGCAU	UAGCAGAAUCAUCAAGGUUCU	Cleavage	1
osa-miR172c	SSIV-3	2.5	-1	1	21	509	529	UGAAUCUUGAUGAUGCUGCAC	UAGCAGAAUCAUCAAGGUUCU	Cleavage	1
osa-miR5522	SSIII-2	2.5	-1	1	21	4009	4029	AACAAUAGGAAUGGGAGGCAU	GAGCCUCCCAUUCAUAUUGUC	Cleavage	1
osa-miR5071	SSIV-1	3	-1	1	21	865	885	UCAAGCAUCAUAUCGUGGACA	CCUCUGCAAUAUGAUGUUUGG	Cleavage	1
osa-miR1435	SSIV-3	3.5	-1	1	20	586	605	UUUCUUAAGUCAAACUUUUU	GAAGCGUCUGAUUUAAGAAA	Cleavage	1
osa-miR1852	SSIII-1	3.5	-1	1	21	461	481	AUAUGGAUUCAGAAUGCAGGU	AACUGUCUUCUGAAUCUAUGG	Cleavage	1
osa-miR2275	SSIV-2	3.5	-1	1	22	999	1020	UUUGGUUUCCUCCAAUAUCUCA	CAAGCUAGUGGAGGAAACUGAG	Cleavage	1
osa-miR2275	SSIV-2	3.5	-1	1	22	999	1020	UUUGGUUUCCUCCAAUAUCUCA	CAAGCUAGUGGAGGAAACUGAG	Cleavage	1
osa-miR2865	SSII-1	3.5	-1	1	22	708	729	CUCAGCAGUCGACUGUACCGUG	AAUGGGACAGUCAGUUGCUGAG	Translation	1
osa-miR398b	SSIII-1	3.5	-1	1	21	1729	1749	UGUGUUCUCAGGUCGCCCCUG	GAUGGGCCACCUGGGAAUGCA	Cleavage	1
osa-miR5833	SSI	3.5	-1	1	21	50	70	UCCUCCUCGGGCUCAUCGGGC	CGCAGGUGAGGCCGGGGAGGA	Translation	1
osa-miR1439	SSIII-1	4	-1	1	21	2272	2292	UUUUGGAACGGAGUGAGUAUU	GUGACUGAUUCCGUUGCAAAA	Cleavage	1
osa-miR169i	SSI	4	-1	1	22	1241	1262	UGGUGAUAAGGGUGUAGCUCUG	ACAAGUUUCUCCCUUAUCAUUA	Cleavage	1
osa-miR1847	SSIV-1	4	-1	1	21	1839	1860	UGCAGUUUG-CAGUUGUGGCAC	CUGCCAUGACUGGCAAACUGCA	Cleavage	1
osa-miR1860	SSIV-1	4	-1	1	21	813	833	AGAAAACCAGCUUCCAGAUCU	GGAGCUGGAAGCUAGGUUUCU	Cleavage	1
osa-miR2927	SSII-2	4	-1	1	23	975	997	UGUCGUCGUCGAUGGAGCCCAUG	UGGUGGUUCCAUCUACGGUGAUG	Translation	1
osa-miR5144	SSII-3	4	-1	1	21	49	69	UUCUUGUGCUGCUGAAGAGAC	GCCUCUUCGGCGUCACGGGGA	Cleavage	1
osa-miR5337a	GBSSII	4	-1	1	21	234	253	AAAUUACUUGUCGUUCUAGCU	UGCUGGAAUGACAA-UAAUUU	Cleavage	1
osa-miR5515	SSIII-1	4	-1	1	21	335	355	CCGAUGGUUGUUCUACAGGUG	GUAAUGUAGAAGAAUCAUCGG	Translation	1
osa-miR5816	SSIV-2	4	-1	1	24	2132	2155	UAGGAGUGUUUGUAGGAGCGCCAC	ACUUAUCUUCUACAAAUGCUUCUC	Cleavage	1
osa-miR6256	SSIII-2	4	-1	1	22	304	325	GUAGUACUCGGUUGUAGGUGUA	GAUACGUACAACAGAUUACUAC	Translation	1
osa-miR1432	SSI	4.5	-1	1	21	1118	1138	CAGGUGUCAUCUCCCCUGAAC	AUUCAUGGGAGGUCACAACUG	Cleavage	1
osa-miR156a	SSII-3	4.5	-1	1	20	1205	1223	UGACAGAAGAGAGUGAGCAC	ACGCUC-CUCUCUUCCGUCA	Cleavage	1
osa-miR156b	SSII-3	4.5	-1	1	20	1205	1223	UGACAGAAGAGAGUGAGCAC	ACGCUC-CUCUCUUCCGUCA	Cleavage	1
osa-miR156c	SSII-3	4.5	-1	1	20	1205	1223	UGACAGAAGAGAGUGAGCAC	ACGCUC-CUCUCUUCCGUCA	Cleavage	1
osa-miR156d	SSII-3	4.5	-1	1	20	1205	1223	UGACAGAAGAGAGUGAGCAC	ACGCUC-CUCUCUUCCGUCA	Cleavage	1
osa-miR156e	SSII-3	4.5	-1	1	20	1205	1223	UGACAGAAGAGAGUGAGCAC	ACGCUC-CUCUCUUCCGUCA	Cleavage	1
osa-miR156f	SSII-3	4.5	-1	1	20	1205	1223	UGACAGAAGAGAGUGAGCAC	ACGCUC-CUCUCUUCCGUCA	Cleavage	1
osa-miR156g	SSII-3	4.5	-1	1	20	1205	1223	UGACAGAAGAGAGUGAGCAC	ACGCUC-CUCUCUUCCGUCA	Cleavage	1
osa-miR156h	SSII-3	4.5	-1	1	20	1205	1223	UGACAGAAGAGAGUGAGCAC	ACGCUC-CUCUCUUCCGUCA	Cleavage	1
osa-miR156i	SSII-3	4.5	-1	1	20	1205	1223	UGACAGAAGAGAGUGAGCAC	ACGCUC-CUCUCUUCCGUCA	Cleavage	1
osa-miR156j	SSII-3	4.5	-1	1	20	1205	1223	UGACAGAAGAGAGUGAGCAC	ACGCUC-CUCUCUUCCGUCA	Cleavage	1
osa-miR156k	SSII-3	4.5	-1	1	21	1204	1223	UGACAGAAGAGAGAGAGCACA	GACGCUC-CUCUCUUCCGUCA	Cleavage	1
osa-miR160a	SSIV-1	4.5	-1	1	21	1255	1275	GCGUGCAAGGAGCCAAGCAUG	GAUGGUUGGUUCCUUGAGCGG	Cleavage	1
osa-miR160b	SSIV-1	4.5	-1	1	21	1255	1275	GCGUGCAAGGAGCCAAGCAUG	GAUGGUUGGUUCCUUGAGCGG	Cleavage	1
osa-miR167h	SSIV-1	4.5	-1	1	21	2706	2726	AGGUCAUGCUGUAGUUUCAUC	UGUGGAGCUGCGGAAUGGCUU	Cleavage	1
osa-miR169r	GBSSII	4.5	-1	1	21	794	814	UGGCAAGUCUCCUCGGCUACC	CCUACCAGGGUAGAUUUGCCA	Translation	1
osa-miR172b	SSI	4.5	-1	1	21	574	593	GGAAUCUUGAUGAUGCUGCAU	GAGAAGCA-CAUUAAGAUUCC	Cleavage	1
osa-miR172d	SSIII-1	4.5	-1	1	20	1130	1149	GCAGCACCAUCAAGAUUCAC	CAGGGGAUUGGUGGUGCUGC	Cleavage	2
osa-miR1847	SSIV-2	4.5	-1	1	21	1665	1686	UGCAGUUUG-CAGUUGUGGCAC	UUGCCAUGACUGGCAGACUGCA	Cleavage	1
osa-miR1847	SSII-2	4.5	-1	1	21	1338	1358	UGCAGUUUGCAGUUGUGGCAC	CCACAACGACUGGAAGCUGCA	Cleavage	1
osa-miR1861h	SSII-2	4.5	-1	1	22	408	430	CGGUCUU-GAGGCAGGAACUGAG	GUCAGUUCCUGCUUCCAAGGCUG	Cleavage	1
osa-miR1861j	SSII-2	4.5	-1	1	22	408	430	CGGUCUU-GAGGCAGGAACUGAG	GUCAGUUCCUGCUUCCAAGGCUG	Cleavage	1
osa-miR2055	SSIV-3	4.5	-1	1	21	874	894	UUUCCUUGGGAAGGUGGUUUC	GUAAUUCAUUUCCUGAGGAAA	Cleavage	1
osa-miR2100	SSIV-2	4.5	-1	1	22	1816	1837	UUCUCUCAAGUUGCCAAACAAG	GAUGUUCAGCAACUUGAUAGGG	Cleavage	1
osa-miR2275d	SSIV-1	4.5	-1	1	22	768	789	CUUGUUUUUCUCCAAUAUCUCA	AUUCAAAUUGGAGAAAGAAAGG	Cleavage	1
osa-miR2863b	SSII-1	4.5	-1	1	21	688	708	UUCGUUUAUUUGGACUAGAGU	CAACUAAGUCAAAUAAGUGAA	Cleavage	1
osa-miR2919	SSII-1	4.5	-1	1	19	19	37	AAGGGGGGGGGGGGAAAGA	UCCUCCCUCCUCGCCCCUU	Cleavage	1
osa-miR2931	SSIII-1	4.5	-1	1	20	3411	3430	CUUUAUUGUUGAUGUCAAAA	UUUUGACGUCGACGAUGAUA	Cleavage	1
osa-miR395c	SSIV-2	4.5	-1	1	21	617	637	GUGAAGUGUUUGGAGGAACUC	GUGCUCUUUUAGAUGCUUCGC	Cleavage	1
osa-miR395x	SSIV-2	4.5	-1	1	21	617	637	GUGAAGUGUUUGGAGUAGCUC	GUGCUCUUUUAGAUGCUUCGC	Cleavage	1
osa-miR396f	SSIV-1	4.5	-1	1	22	2161	2182	UCUCCACAGGCUUUCUUGAACU	CAUUCCAGGAAAUUUGUGGGGA	Translation	1
osa-miR398a	SSIII-1	4.5	-1	1	21	1729	1749	UGUGUUCUCAGGUCACCCCUU	GAUGGGCCACCUGGGAAUGCA	Cleavage	1
osa-miR414	SSII-3	4.5	-1	1	21	855	875	UCAUCCUCAUCAUCAUCGUCC	GGAGGAUGGCGAUGACGAUGA	Cleavage	1
osa-miR414	SSII-2	4.5	-1	1	21	189	209	UCAUCCUCAUCAUCAUCGUCC	GGCCGCCGGUGGUGAGGAUGG	Cleavage	1
osa-miR426	SSIV-2	4.5	-1	1	21	1216	1236	UUUUGGAAGUUUGUCCUUACG	AUUGUGGACAAUUUUCUAAAG	Translation	1
osa-miR435	SSIII-1	4.5	-1	1	20	877	896	UUAUCCGGUAUUGGAGUUGA	AUAGCACCAGUACAGGAUGA	Cleavage	1
osa-miR5075	SSI	4.5	-1	1	20	1	20	UUCUCCGUCGCCGCCGUCCG	AUGGCGACGGCGGCGGGGAU	Cleavage	1
osa-miR5079a	SSIII-1	4.5	-1	1	22	1791	1812	UUUGGAUCUGUUAUUUUGGUAU	UGUUCCAAAUAACAUAUCUGAG	Cleavage	1
osa-miR5079b	SSIII-1	4.5	-1	1	22	1791	1812	UUUGGAUCUGUUAUUUUGGUAU	UGUUCCAAAUAACAUAUCUGAG	Cleavage	1
osa-miR5150	SSIV-1	4.5	-1	1	24	1486	1509	AGAAGCUGCAGCUGUCAGAAGCUC	GGCGGUCUGGCAGAUGUAGUUGCU	Translation	1
osa-miR530	SSII-2	4.5	-1	1	20	527	546	UGCAUUUGCACCUGCACCUA	CUGGUGGAGAUGCAGGUGCA	Translation	1
osa-miR5490	SSIII-2	4.5	-1	1	21	3761	3781	UUGGAUUUUUAUUUAGGACGG	CGGUGCUGAAUGGAAAGCCAG	Cleavage	1
osa-miR5499	SSIV-3	4.5	-1	1	21	1597	1617	GAAGGAAGAAUCGUUAUGGAA	CUCCACAGUGGUUCUUCCGUU	Cleavage	1
osa-miR5515	GBSSI	4.5	-1	1	21	727	747	CCGAUGGUUGUUCUACAGGUG	UACCUGAAGAACAACUACCAG	Cleavage	1
osa-miR5528	SSIII-1	4.5	-1	1	21	449	469	AAGACGGUUUUAGAUGUUGCC	AUCAGUCUCCAGAACUGUCUU	Cleavage	1
osa-miR5529	SSIII-1	4.5	-1	1	21	2578	2598	GUUUCAUCCAUGGACACCGCA	GGAUGUGUCUAUGGAAGAAAU	Cleavage	1
osa-miR5541	SSIII-2	4.5	-1	1	21	3693	3713	UCAAGUGGUGUACUCUAAAGA	UGUUUAUACUGAACCACUUGA	Translation	1
osa-miR5809	GBSSI	4.5	-1	1	20	253	272	UCGUCGCCGGCGACCACAGC	GUCGUGUUCGUCGGCGCCGA	Cleavage	2
osa-miR6249a	SSII-3	4.5	-1	1	21	2380	2400	CGUGAAGAGCUCGCCGGCGGC	CACGCCGCCGAGCUCUACGAG	Cleavage	1
osa-miR6249a	SSII-2	4.5	-1	1	21	2032	2052	CGUGAAGAGCUCGCCGGCGGC	CACGCCGCCGAGCUCUACGAG	Cleavage	1
osa-miR6249b	SSII-3	4.5	-1	1	21	2380	2400	CGUGAAGAGCUCGCCGGCGGC	CACGCCGCCGAGCUCUACGAG	Cleavage	1
osa-miR6249b	SSII-2	4.5	-1	1	21	2032	2052	CGUGAAGAGCUCGCCGGCGGC	CACGCCGCCGAGCUCUACGAG	Cleavage	1
osa-miR7695	SSII-3	4.5	-1	1	24	1320	1343	UGCCUAUGUGGCACGCCACGUGAA	AUGCGGUGGUGUGCCCUAUGGGGA	Cleavage	1
osa-miR812v	GBSSII	4.5	-1	1	24	1239	1262	AUGGCUGCACUUAAAAUGGGACGG	GUCAGACAUACUAAUUGCAGCCAU	Translation	1
osa-miR821a	SSI	4.5	-1	1	24	1254	1277	AAGUCAUCAACAAAAAAGUUGAAU	UUAUCAUUAUUCUGUUGAUGACCU	Cleavage	1
osa-miR821b	SSI	4.5	-1	1	24	1254	1277	AAGUCAUCAACAAAAAAGUUGAAU	UUAUCAUUAUUCUGUUGAUGACCU	Cleavage	1
osa-miR821c	SSI	4.5	-1	1	24	1254	1277	AAGUCAUCAACAAAAAAGUUGAAU	UUAUCAUUAUUCUGUUGAUGACCU	Cleavage	1
