# Supplementary figures and images for: Genome-Wide Identification and Genetic Variations of the Starch Synthase Gene Family in Rice
Source: MDPI journal article supplement (doi:10.3390/plants10061154), 2021-06-06

A

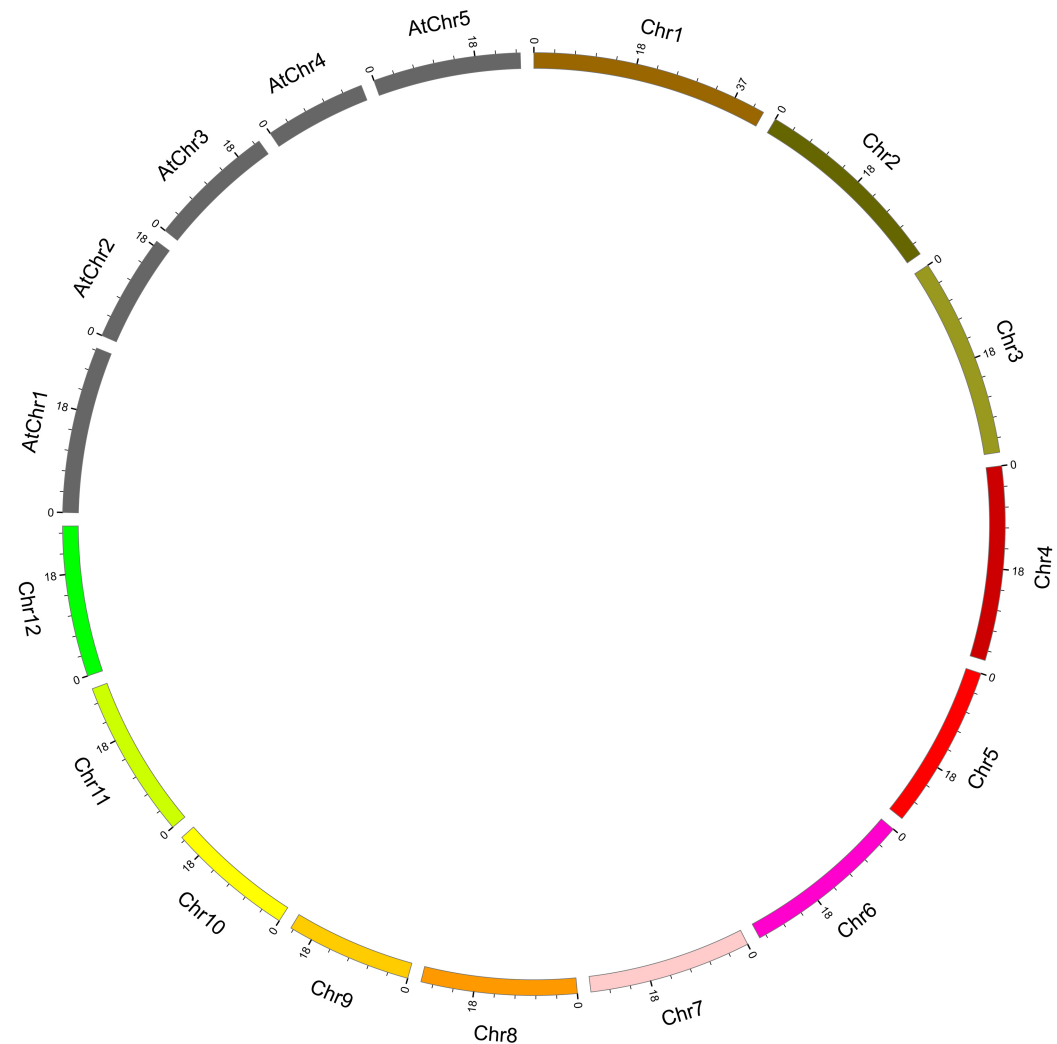

B

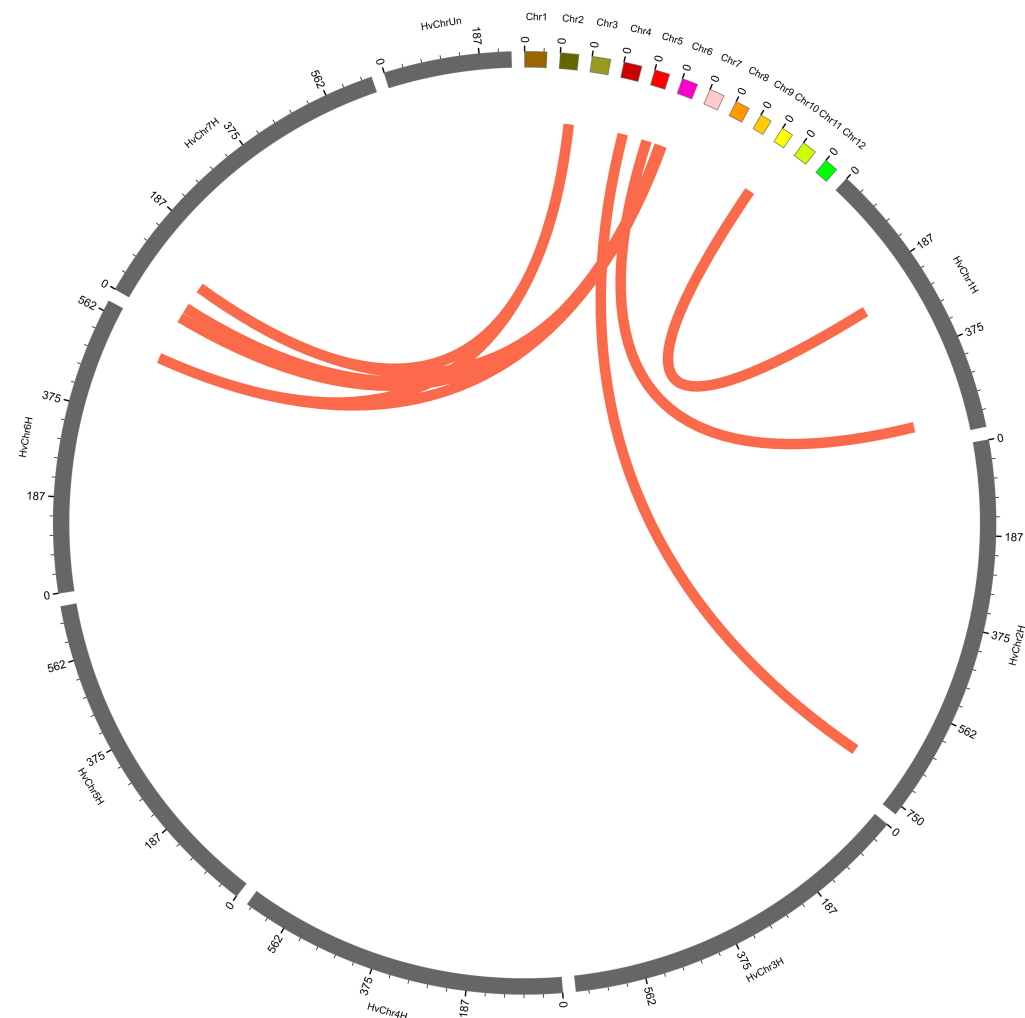

C

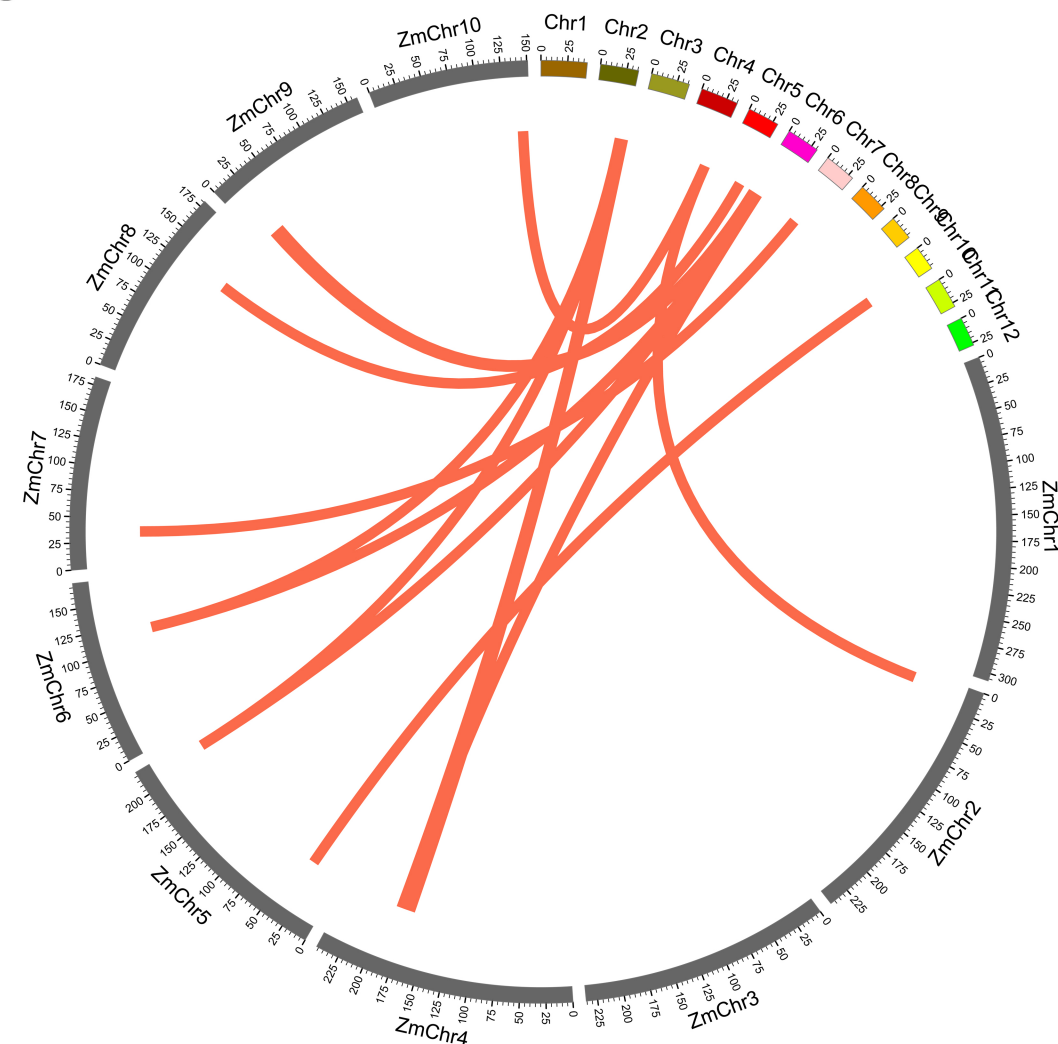

D

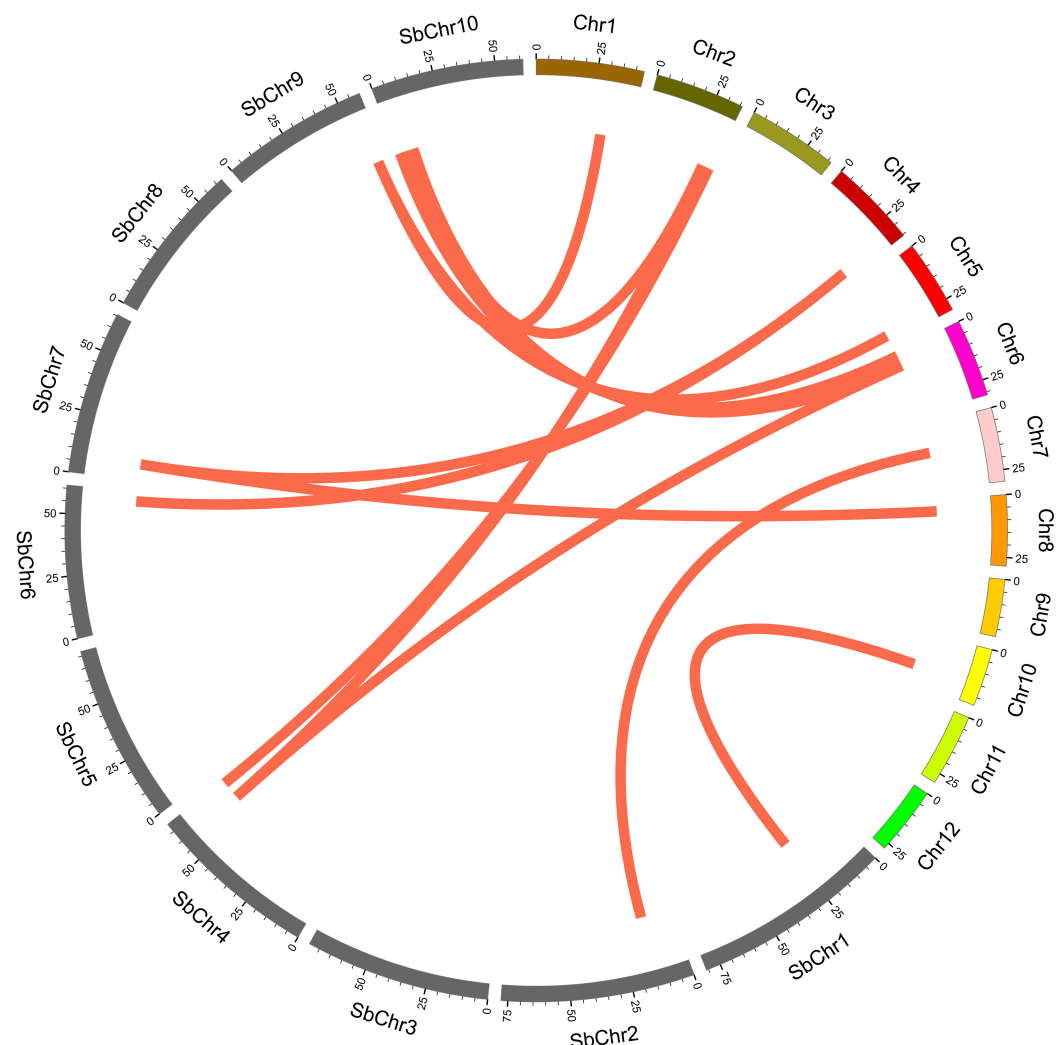

E

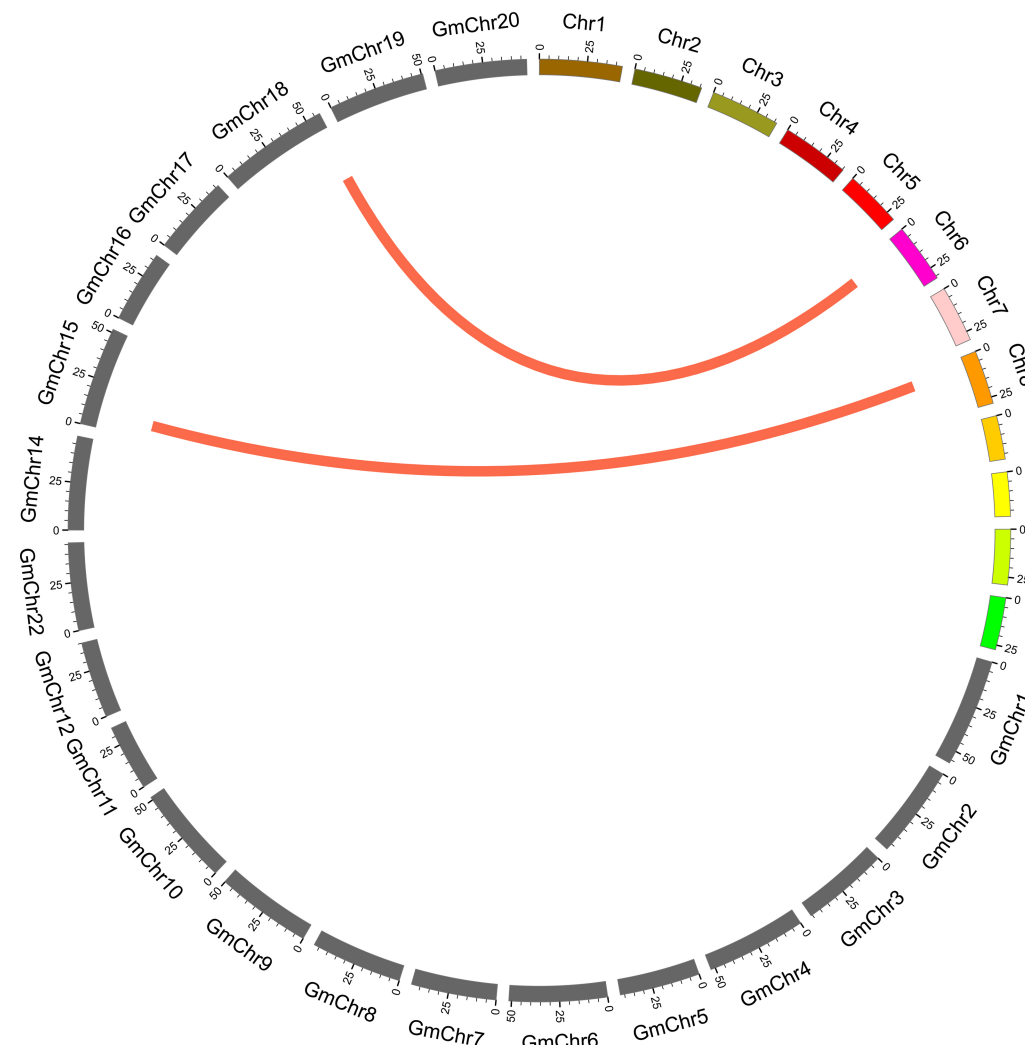

F

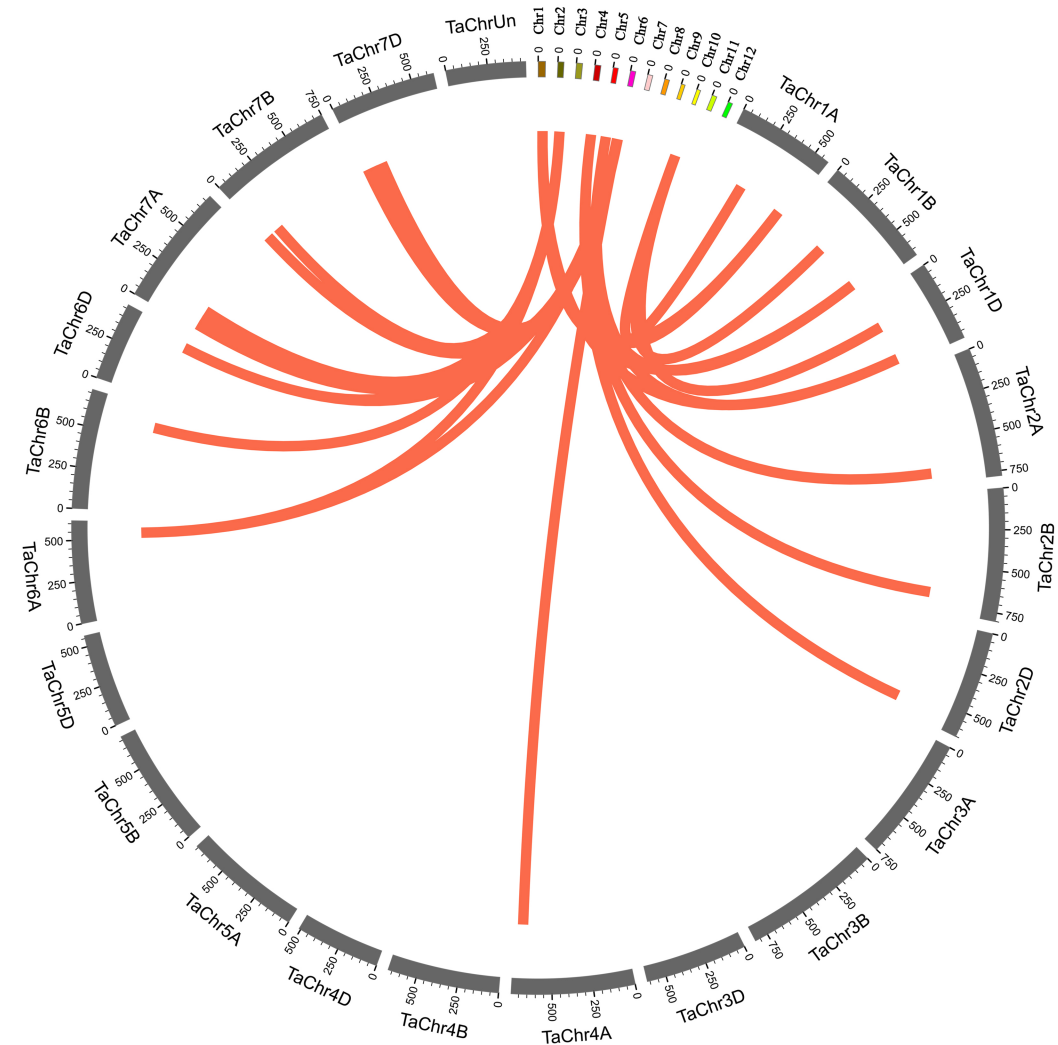

Supplement: s1 [file s1]

A

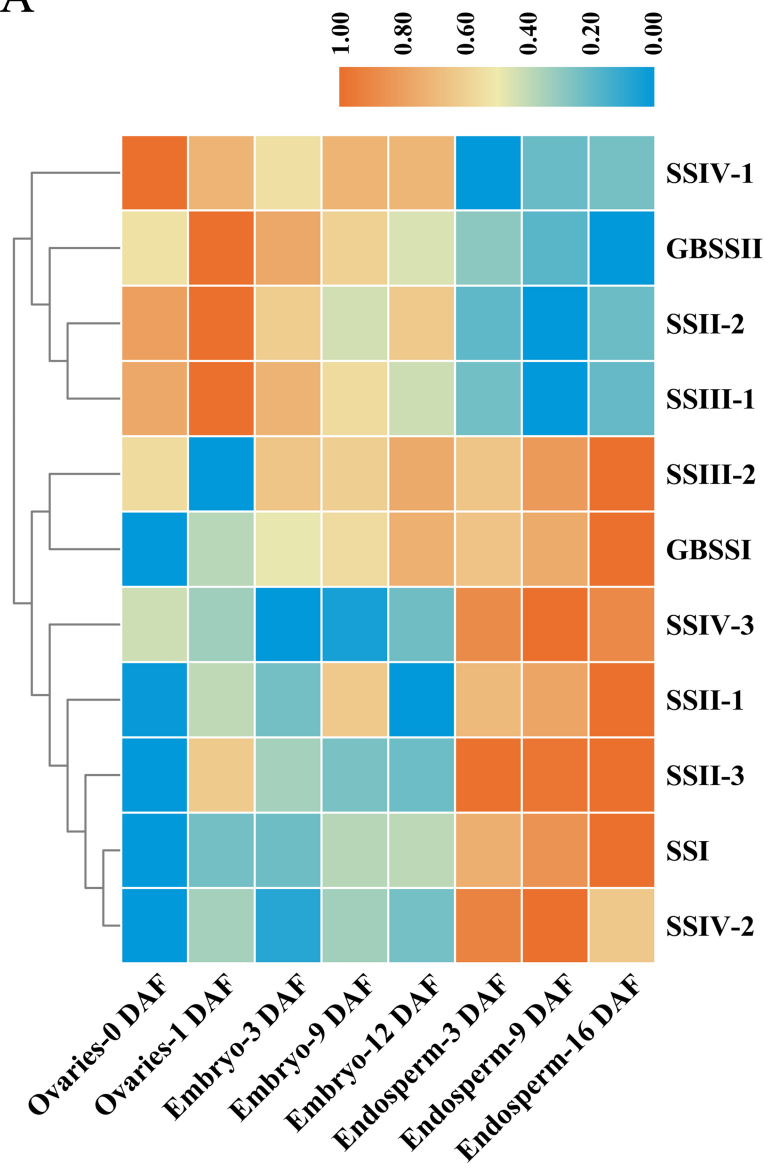

B

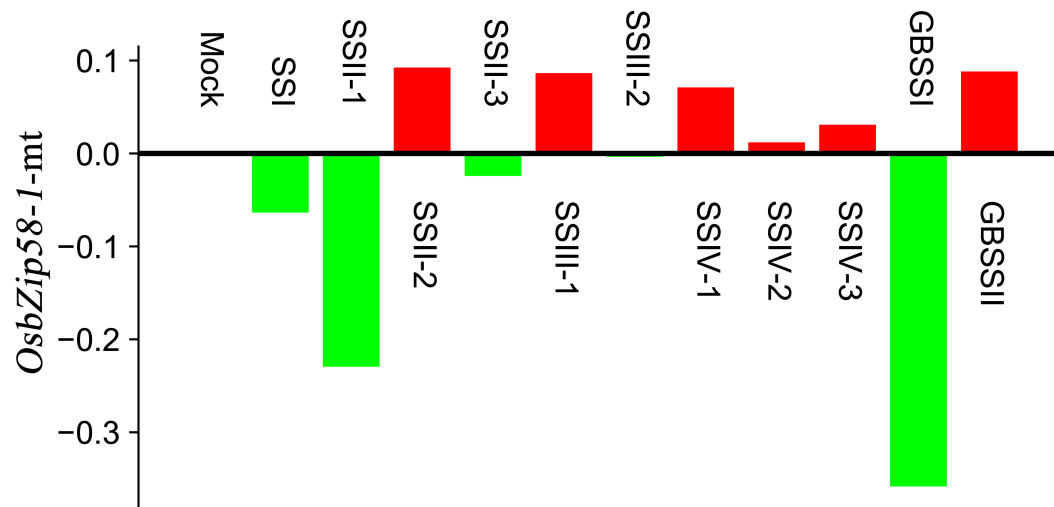

C

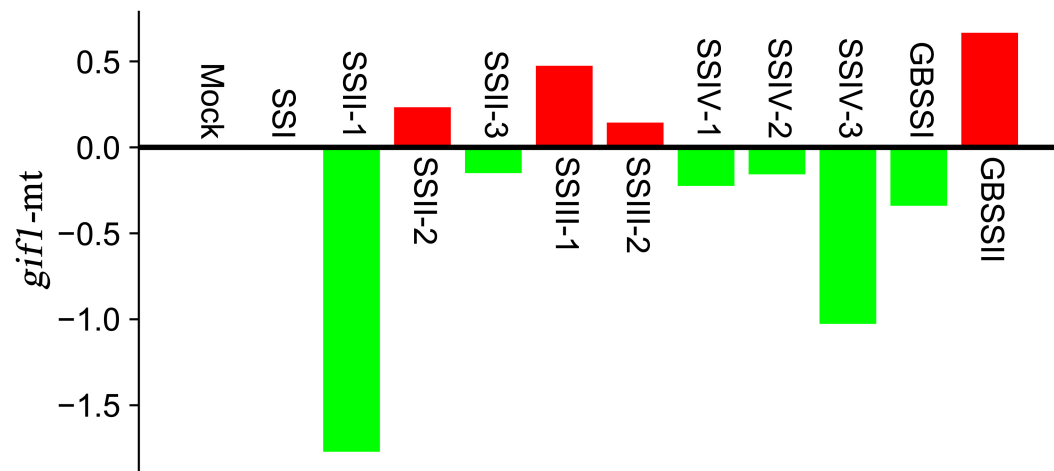

Supplement: s1 [file s1]

A

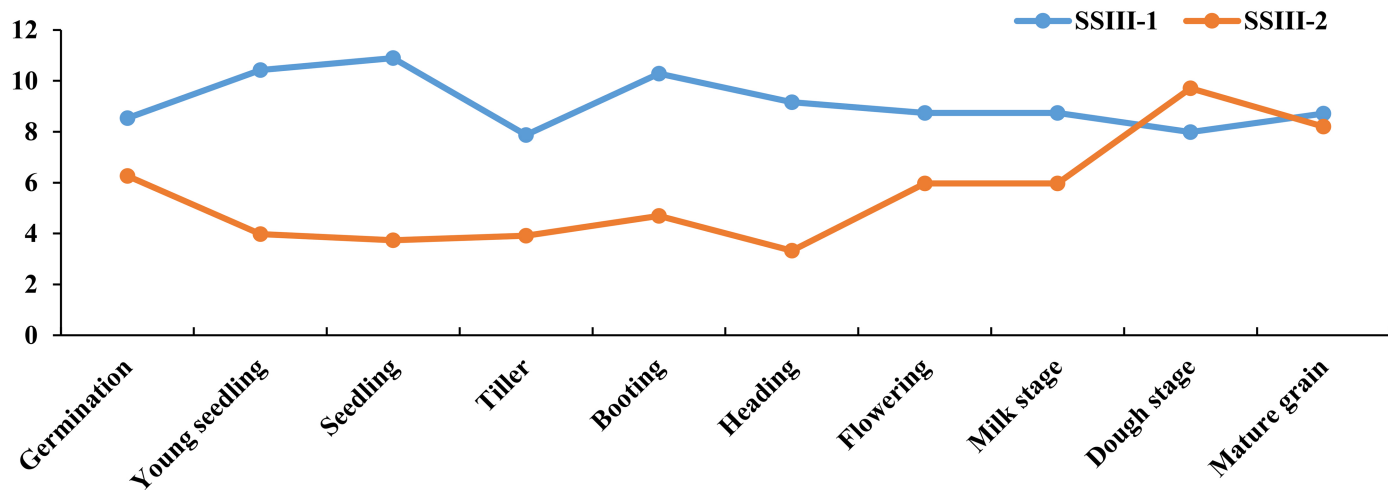

B

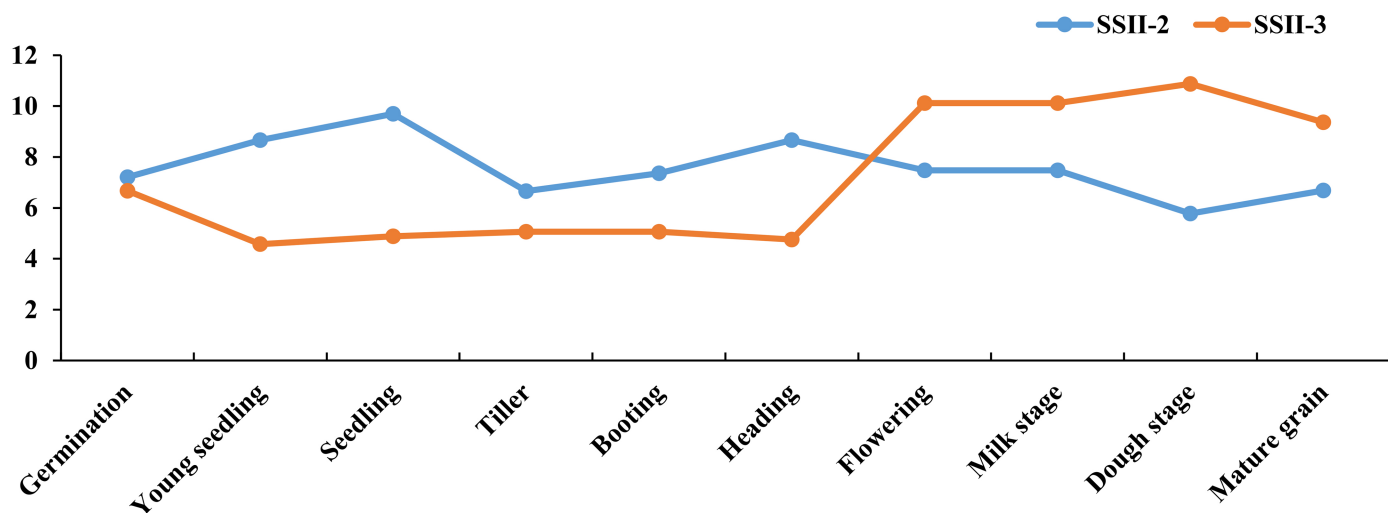

C

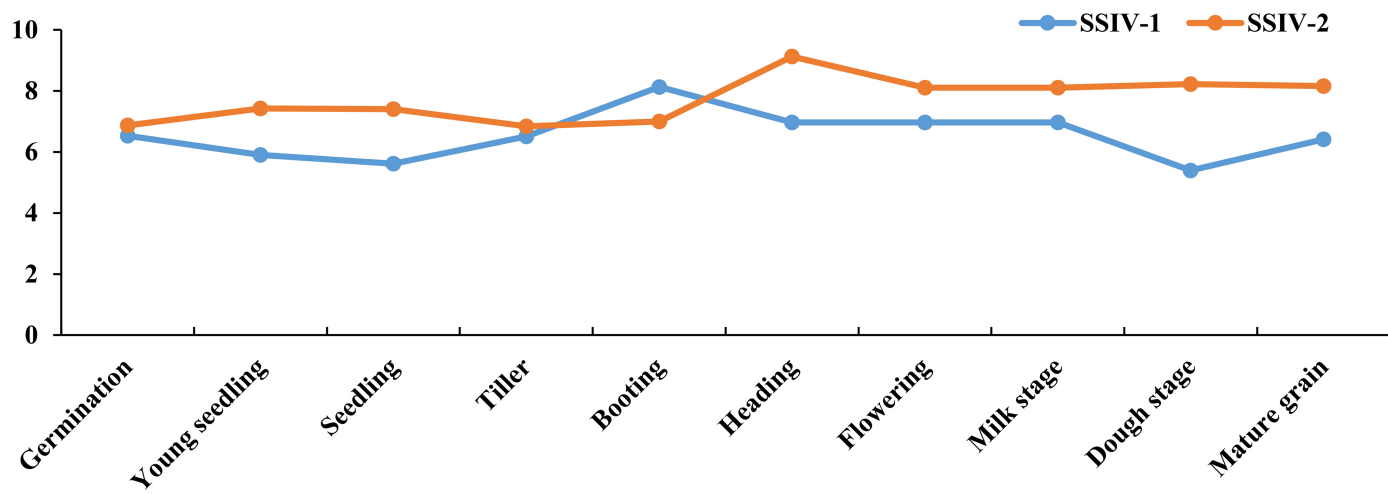

Supplement: s1 [file s1]

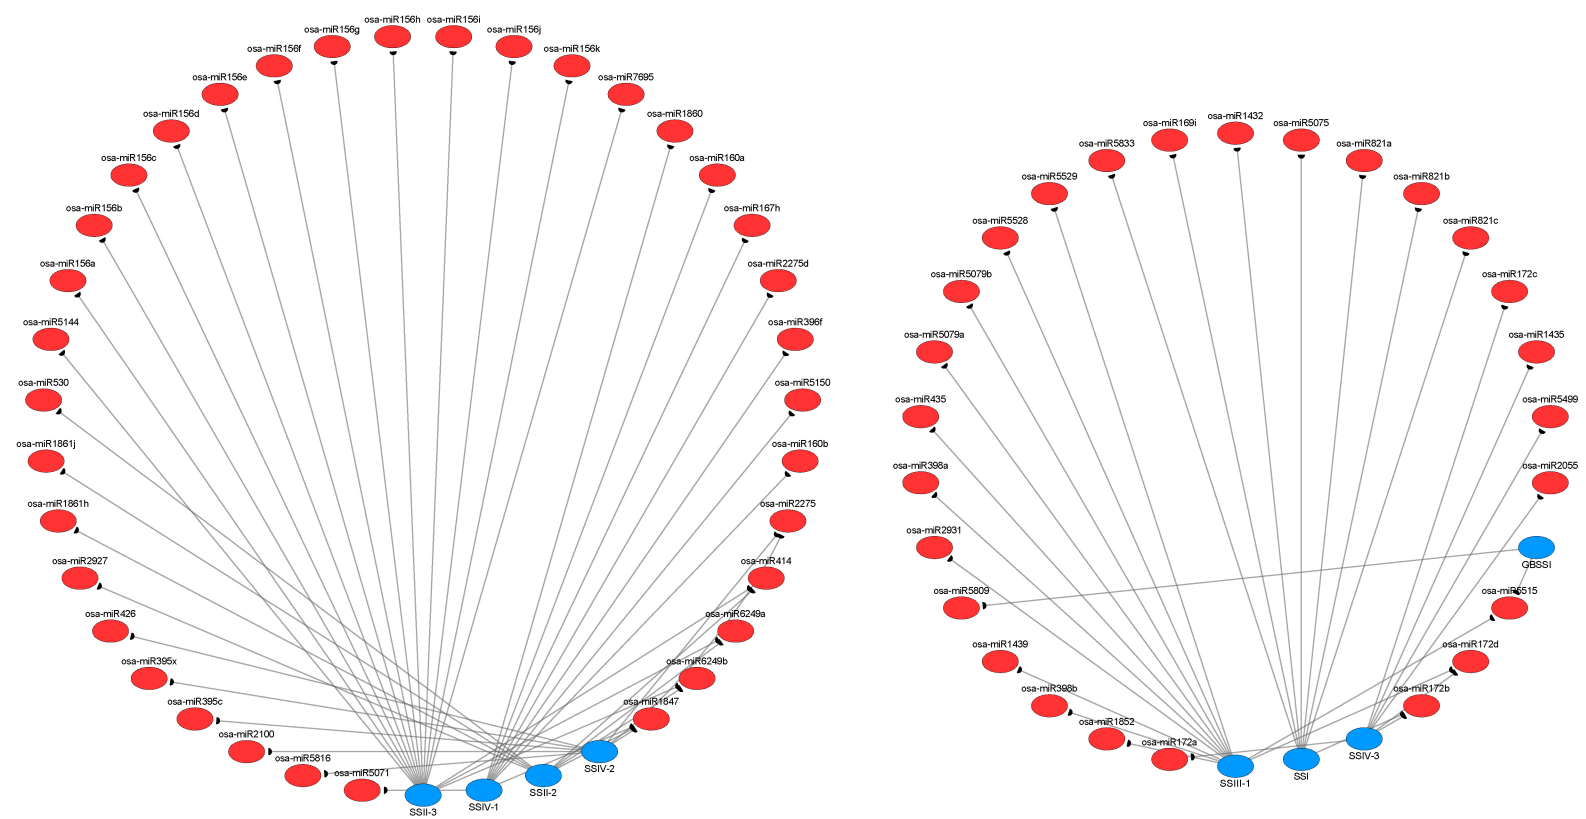

Supplement: s1 [file s1]
